# Supplementary material
Source: Springer Nature journal article supplement (https://www.springermedizin.de/resource/supplementary/12958_2009_509_MOESM5_ESM.pdf/9568176)

**A****Relative Luciferase Activity**

0.0 1.0 2.0 3.0 4.0

PGL4.10[Luc2]

Luc2

\*

-343 -1

-343/-1

Luc2

\*†

†

-1637 -1

-1637/-1

Luc2

\*†

†

□ Vehicle

■ Dexamethasone

**B****Relative Luciferase Activity**

0.0 0.3 0.5 0.8 1.0 1.3 1.5

Luc2

Luc2

Luc2

□ Vehicle

■ BtcAMP+PDA

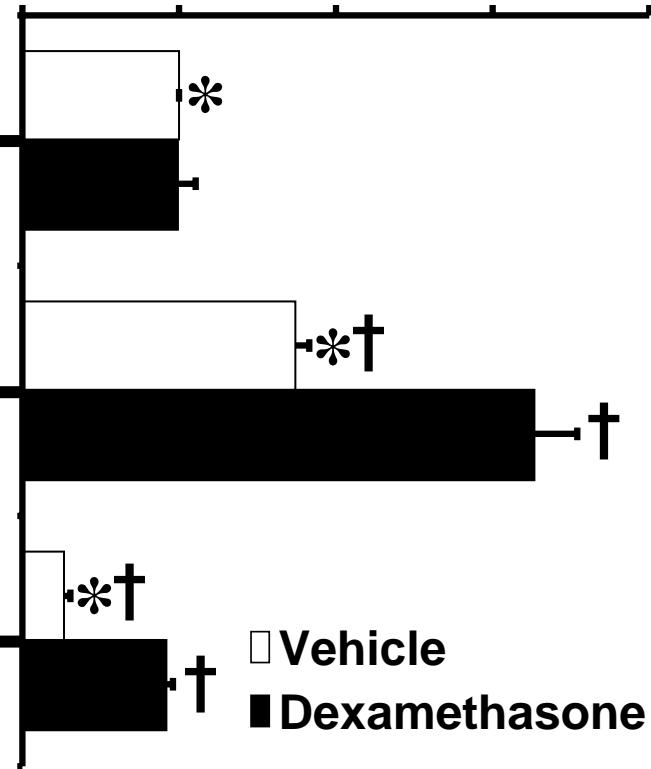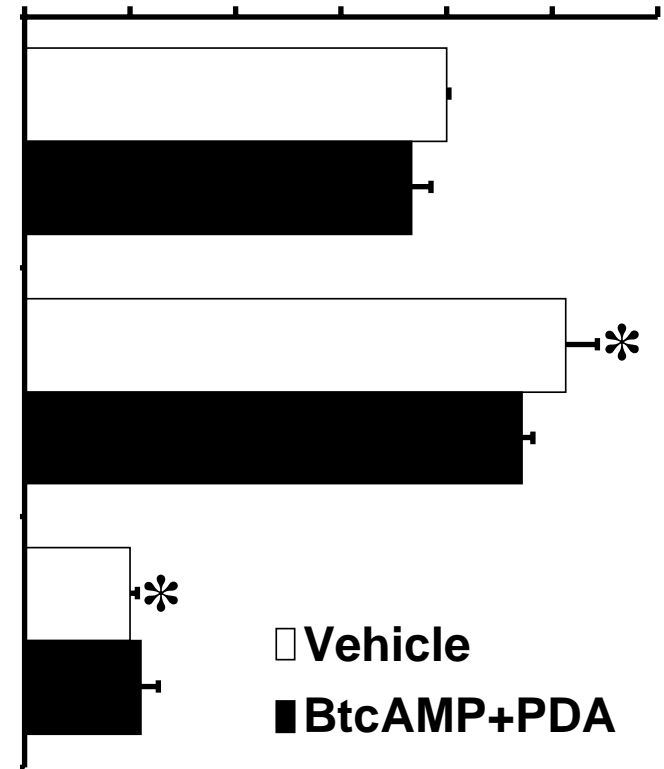

Supplement: MOESM5 [file 9568176]
